# Supplementary material for: Modes of Interaction in Naturally Occurring Medical Encounters With General Practitioners: The “One in a Million” Study
Source: PubMed Central journal article supplement (PMC8114434; doi:10.1177/1049732321993790), 2021-03-04
Supplement: sj-pdf-1-qhr-10.1177_1049732321993790.pdf [file sj-pdf-1-qhr-10.1177_1049732321993790.pdf]

Supplementary Table 2 Participants

| <b>Patient</b> |               |            | <b>GP</b>     |            | <b>Consultation</b> |                               |                 |
|----------------|---------------|------------|---------------|------------|---------------------|-------------------------------|-----------------|
| <i>No.</i>     | <i>Gender</i> | <i>Age</i> | <i>Gender</i> | <i>Age</i> | <i>Length</i>       | <i>Main contact reason(s)</i> | <i>Usual GP</i> |
| 1              | Woman         | 90-99      | Woman         | 30-39      | 12:05               | Neurological                  | No              |
| 2              | Woman         | 70-79      | Woman         | 50-59      | 09:54               | Cardiovascular                | Yes             |
| 3              | Woman         | 70-79      | Woman         | 30-39      | 11:38               | Digestive                     | No              |
| 4              | Woman         | 50-59      | Man           | 40-49      | 09:06               | Musculoskeletal + general     | No              |
| 5              | Woman         | 50-59      | Woman         | 40-49      | 18:28               | Psychological                 | No              |
| 6              | Woman         | 40-49      | Woman         | 50-59      | 15:35               | Musculoskeletal               | No              |
| 7              | Woman         | 30-39      | Woman         | 30-39      | 07:12               | Psychological                 | Yes             |
| 8              | Man           | 30-39      | Woman         | 30-39      | 18:24               | Musculoskeletal + cardio      | Yes             |
| 9              | Man           | 30-39      | Woman         | 40-49      | 15:42               | Digestive                     | NA              |
| 10             | Man           | 20-29      | Man           | 50-59      | 09:49               | Psychological                 | Yes             |
